# Supplementary material for: Complementing Tissue Testing With Plasma Mutation Profiling Improves Therapeutic Decision-Making for Patients With Lung Cancer
Source: PubMed Central journal article supplement (PMC8873935; doi:10.3389/fmed.2022.758464), 2022-02-11
Supplement: Data_Sheet_1.pdf [file Data_Sheet_1.pdf]

## **SUPPLEMENTARY DATA**

### **Complementing Tissue Testing with Plasma Mutation Profiling Improves Therapeutic Decision Making for Lung Cancer Patients**

Yukti Choudhury<sup>1</sup>, Min-Han Tan<sup>2</sup>, Jun Li Shi<sup>3</sup>, Augustine Tee<sup>4</sup>, Kao Chin Ngeow<sup>1</sup>, Jonathan Poh<sup>1</sup>, Ruth Rosalyn Goh<sup>1,5</sup>, Jamie Mong<sup>3,‡</sup>

<sup>1</sup> Lucence Diagnostics Pte. Ltd., Singapore

<sup>2</sup> Lucence Health Inc, Palo Alto, CA, United States

<sup>3</sup> Institute of Bioengineering and Bioimaging, Singapore

<sup>4</sup> Department of Respiratory and Critical Care Medicine, Changi General Hospital, Singapore

<sup>5</sup> Faculty of Medicine, Imperial College London

## SUPPLEMENTARY FIGURES AND TABLES

**Table S1. Composition of gene panel used for plasma NGS test (LiquidHALLMARK®).**

The same gene panel was used for tissue NGS (TissueHALLMARK®) for panel-wide comparison of mutations. \*Genes for which copy number alterations can be calculated in both plasma and tissue tests.

|                 |               | LiquidHALLMARK® Panel (49 Genes) |               |              |              |              |              |               |               |                |  |
|-----------------|---------------|----------------------------------|---------------|--------------|--------------|--------------|--------------|---------------|---------------|----------------|--|
| SNVs,<br>indels | <i>ABL1</i>   | <i>AKT1</i>                      | <i>ALK*</i>   | <i>APC</i>   | <i>AR*</i>   | <i>ATM</i>   | <i>BRAF</i>  | <i>CCND1*</i> | <i>CDH1</i>   | <i>CDKN2A*</i> |  |
|                 | <i>CTNNB1</i> | <i>EGFR*</i>                     | <i>ERBB2*</i> | <i>ESR1</i>  | <i>FBXW7</i> | <i>FGFR2</i> | <i>FGFR3</i> | <i>FLT3</i>   | <i>GATA3</i>  | <i>GNA11</i>   |  |
|                 | <i>GNAQ</i>   | <i>GNAS</i>                      | <i>HNF1A</i>  | <i>HRAS</i>  | <i>IDH1</i>  | <i>IDH2</i>  | <i>JAK1</i>  | <i>JAK2</i>   | <i>JAK3</i>   | <i>KIT</i>     |  |
|                 | <i>KRAS</i>   | <i>MAPK1</i>                     | <i>MAP2K1</i> | <i>MED12</i> | <i>MET*</i>  | <i>MTOR</i>  | <i>MYC*</i>  | <i>NFE2L2</i> | <i>NOTCH1</i> | <i>NRAS</i>    |  |
|                 | <i>PDGFRA</i> | <i>PIK3CA*</i>                   | <i>PTEN*</i>  | <i>RAF1</i>  | <i>SMAD4</i> | <i>STK11</i> | <i>TERT</i>  | <i>TP53*</i>  | <i>VHL</i>    |                |  |

**Figure S1. Distribution of (A) volumes of plasma (ml) and (B) yields of cfDNA per ml of plasma for 70 patients.** Median and interquartile ranges are shown with red lines. **(C)** Yield of cfDNA per ml distribution by volume, dotted red line shows median cfDNA per ml (ng) amount = 19.24 ng.

(A)

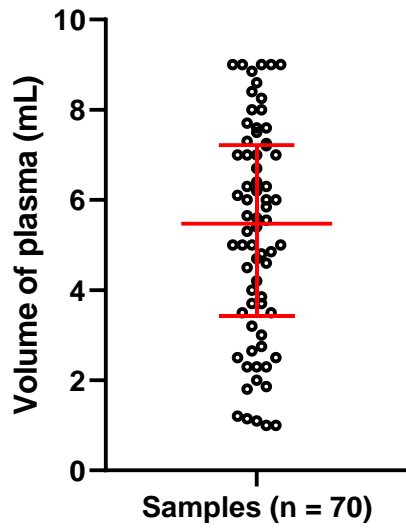

(B)

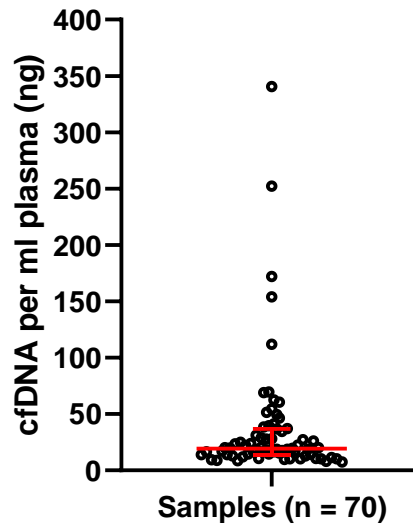

(C)

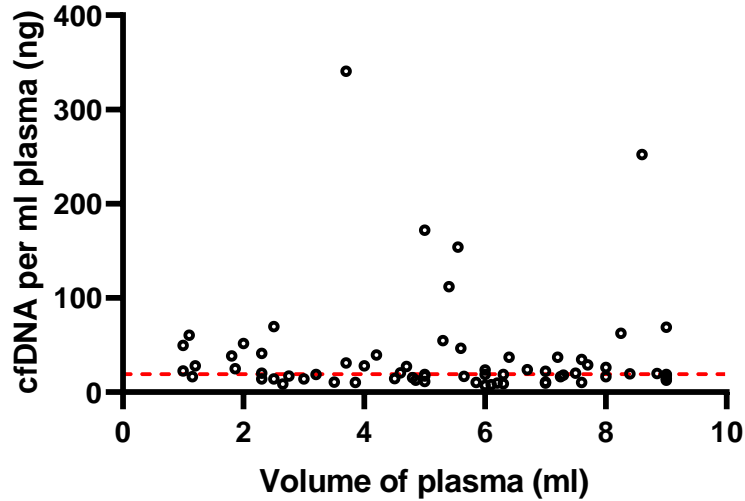

**Figure S2. Availability of *EGFR* test results from tissue biopsy samples among 54 NSCLC patients from a total 71 patients suspected to have lung cancer.**

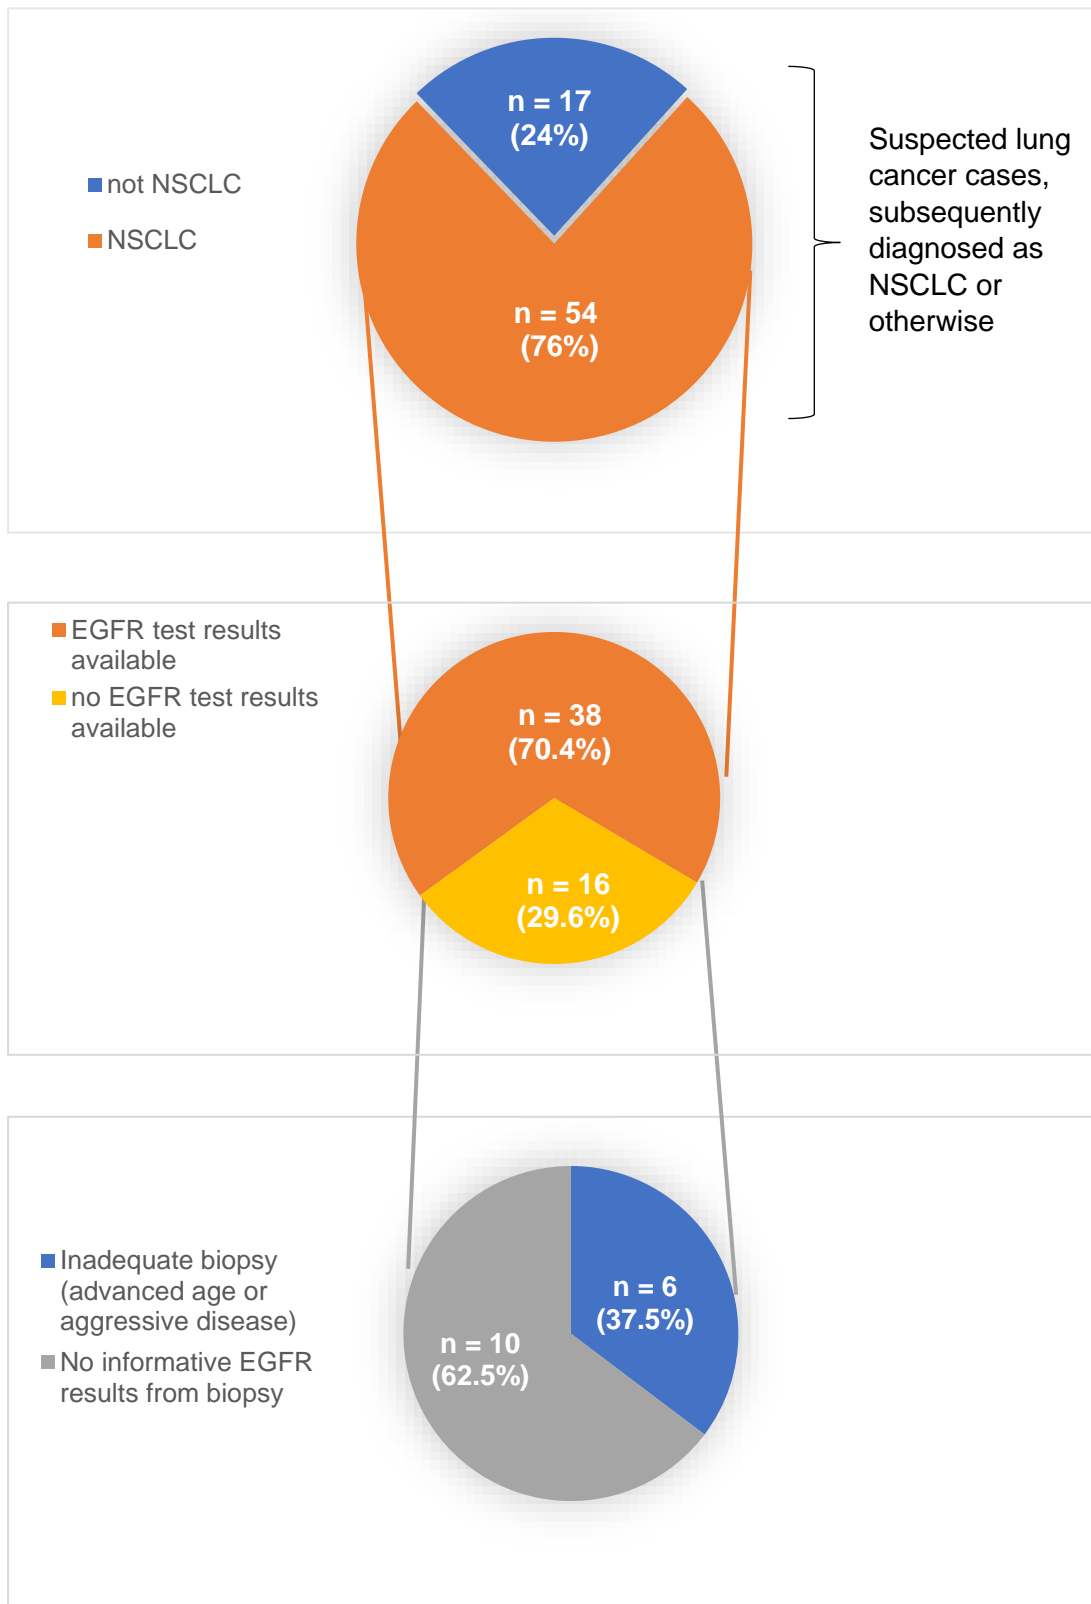

**Figure S3. Distribution of average consensus coverage for plasma NGS across 53 NSCLC samples.** Average consensus coverage colored by detection of any mutations by plasma NGS, and samples in which *EGFR* mutation was not concordantly detected in plasma NGS. Median (8183x) and interquartile ranges for coverage are shown.

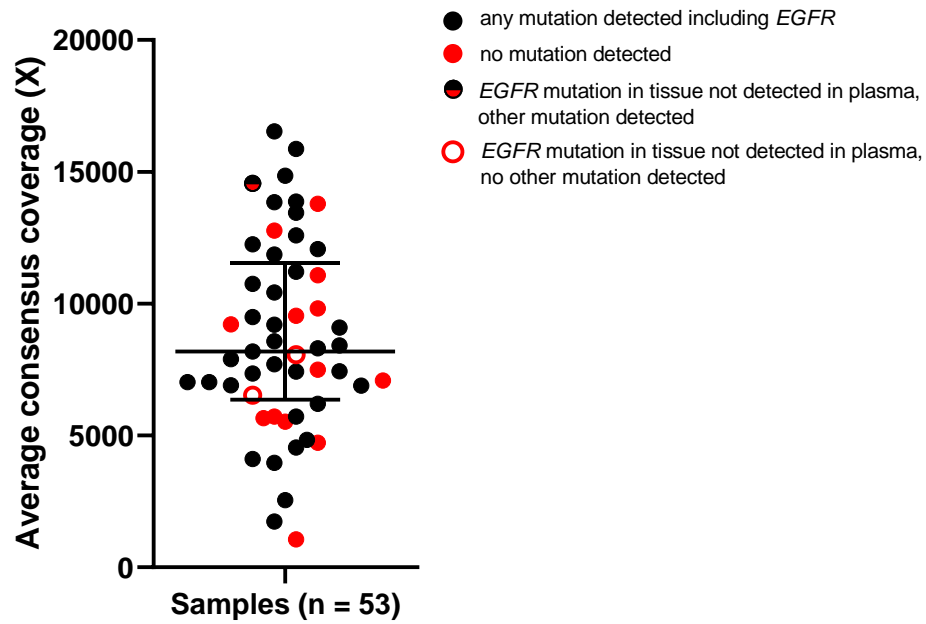

**Figure S4. Allele frequencies (AF) of therapeutically actionable mutations detected by plasma NGS and tissue NGS are correlated.** For the same patient's blood and tissue AFs of mutations detected are correlated ( $\rho = 0.5503$ ,  $p\text{-value} = 0.0221$ ). Red circles indicate cases where mutation was only detected in tissue, while green circles indicate mutations found only in plasma. All discordances were characterized by low detectable AFs, below 10% AF for mutations found only in tissue, and below 1% AF for plasma-only mutations.

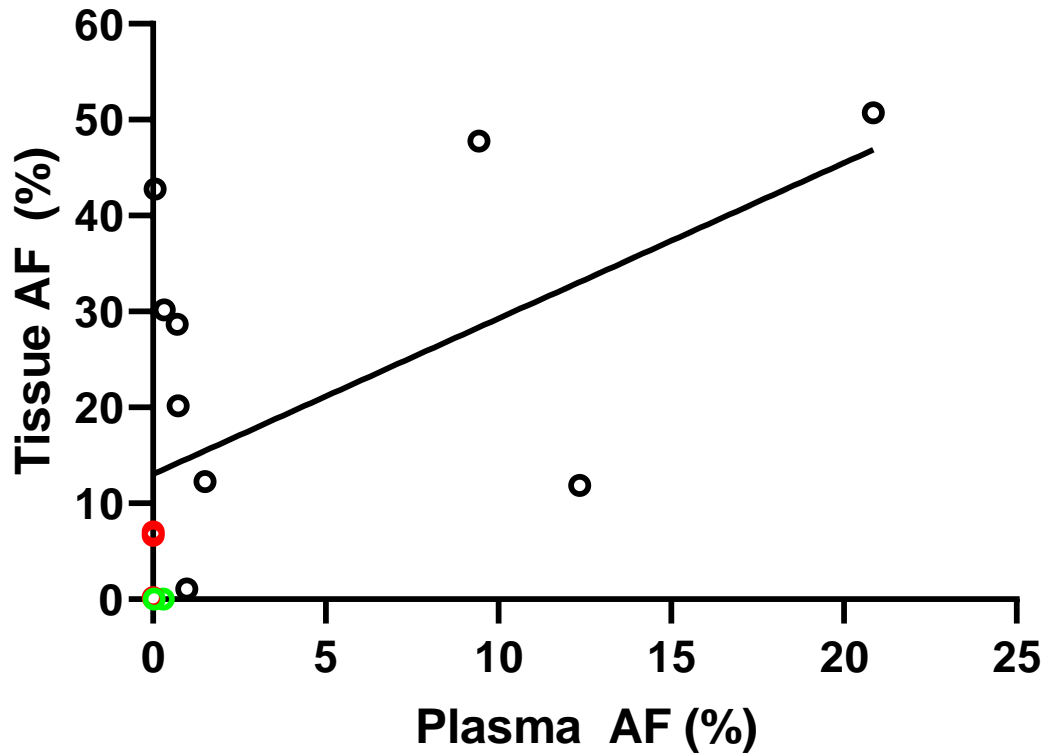

**Table S2. Frequent detection of cancer-specific mutations for non-NSCLC cancer patients by plasma NGS.** SCLC = small cell lung carcinoma; HCC = hepatocellular carcinoma.

| <b>Case</b> | <b>Diagnosis</b>                    | <b>Mutation (HGVS)</b>                              | <b>AF (%)</b> |
|-------------|-------------------------------------|-----------------------------------------------------|---------------|
| 1           | SCLC                                | <i>TP53</i> p.Pro278Arg                             | 27.11         |
| 2           | SCLC                                | <i>TP53</i> p.Tyr163Cys                             | 12.78         |
| 3           | HCC                                 | <i>TP53</i> p.Arg249Ser<br><i>CTNNB1</i> p.Asp32Ala | 1.4<br>0.67   |
| 4           | High grade undifferentiated sarcoma | -                                                   |               |
| 5           | Metastatic Ovarian Cancer           | <i>STK11</i> p.Pro315Leu                            | 0.38          |
| 6           | SCLC                                | <i>TP53</i> p.Arg249GlyfsTer96                      | 3.82          |
| 7           | SCLC                                | <i>TP53</i> p.Gly154Val                             | 27.6          |
